# Supplementary material for: NFE2L2/NRF2 silencing-inducible miR-206 targets c-MET/EGFR and suppresses BCRP/ABCG2 in cancer cells
Source: PubMed Central journal article supplement (PMC5739807; doi:10.18632/oncotarget.22513), 2017-11-18
Supplement: oncotarget-08-107188-s001.pdf [file oncotarget-08-107188-s001.pdf]

## NFE2L2/NRF2 silencing-inducible miR-206 targets c-MET/EGFR and suppresses BCRP/ABCG in cancer cells

### SUPPLEMENTARY MATERIALS

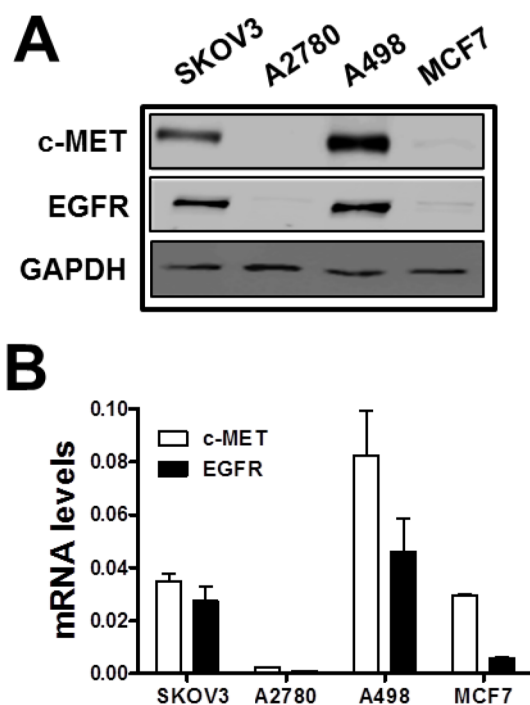

**Supplementary Figure 1:** (A) Protein levels for c-MET and EGFR in four cell lines: ovarian carcinoma SKOV3 and A2780, renal carcinoma A498, and breast carcinoma MCF7. (B) Transcript levels for c-MET and EGFR were assessed in four cell lines. Transcript levels of each gene were normalized with the level of HPRT.

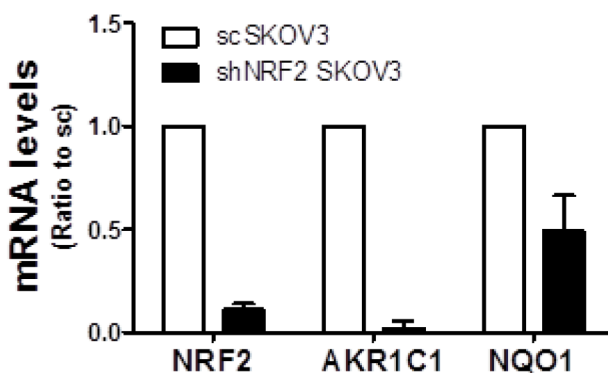

**Supplementary Figure 2:** NRF2-silencing was verified by measuring transcript levels for NRF2, AKR1C1 and NQO-1 in established scSKOV3 and shNRF2-SKOV3 cells. Values are means ± SD from 3-4 experiments.

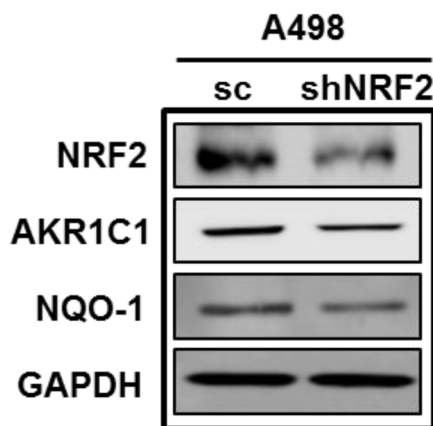

Supplementary Figure 3: NRF2, AKR1C1, and NQO-1 protein levels were determined by Western blotting in scA498 and shNRF2-A498 cells.

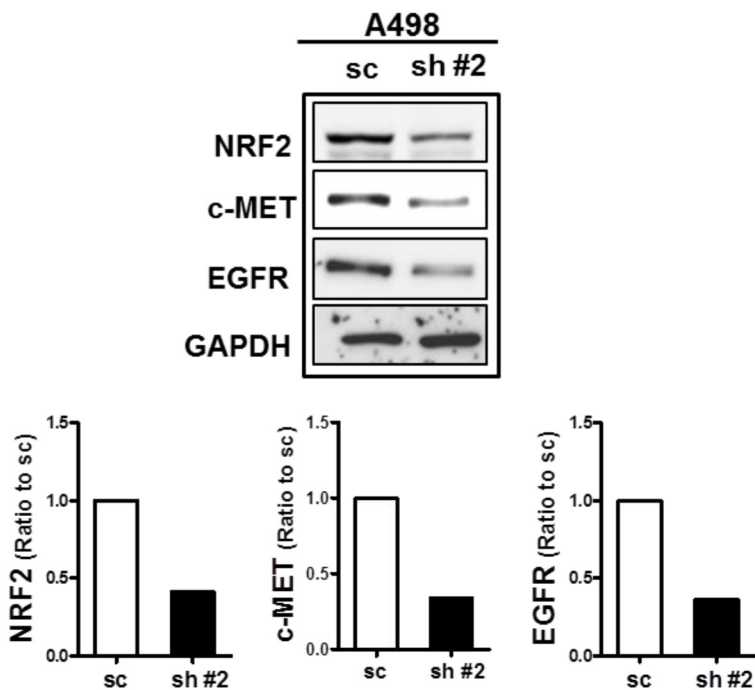

Supplementary Figure 4: Additional *NRF2*-specific shRNA (shNRF2 #2) was transiently transduced into A498, and protein levels of NRF2, c-MET and EGFR were assessed.

**A**

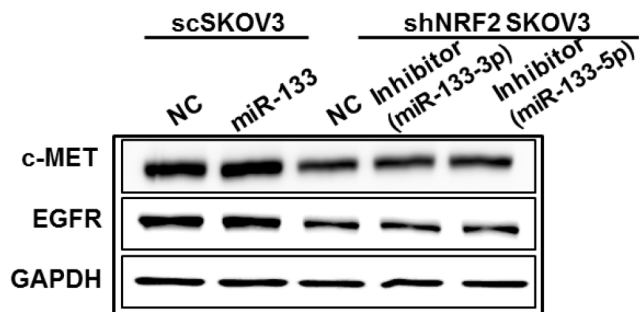

**B**

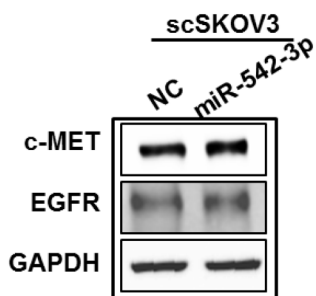

**Supplementary Figure 5: (A)** The effect of the miR-133 mimic or miR-133 inhibitor on c-MET and EGFR protein levels. The scSKOV3 cells were transfected with the miR-133 mimic (100 nM) and the shNRF2 cells were transfected with the miR-133 inhibitor (100 nM). After 18 h-incubation, protein levels for c-MET and EGFR were monitored by Western blotting. **(B)** After transfection of the scSKOV3 with the miR-542 mimic (100 nM), c-MET and EGFR protein level was measured.

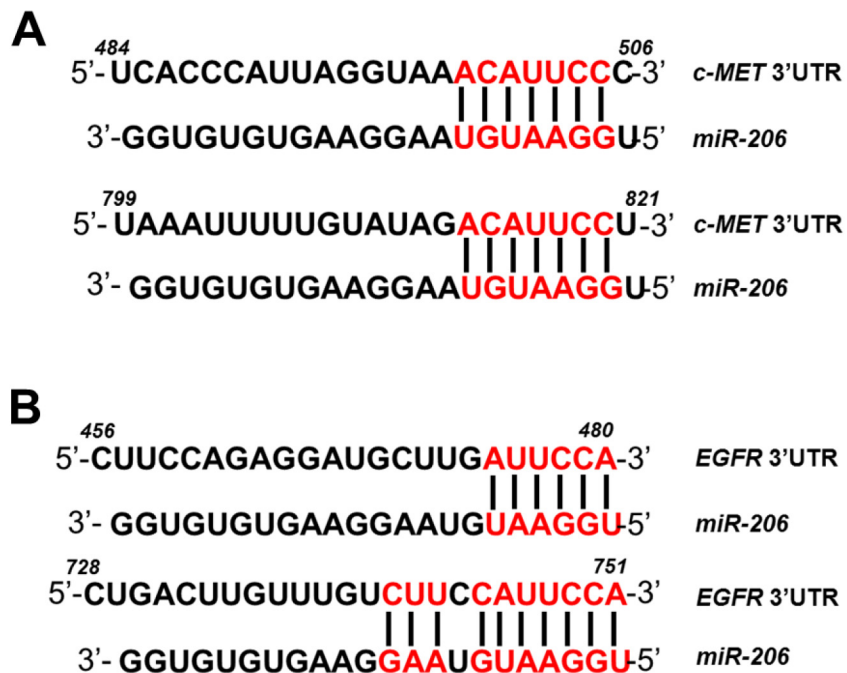

**Supplementary Figure 6:** Target analysis with TargetScan ([http://www.targetscan.org/vert\\_71/](http://www.targetscan.org/vert_71/)) and Diana Tools (<http://diana.imis.athena-innovation.gr/DianaTools/index.php?r=tarbase/index>) showed that miR-206 can bind to the 3'-UTR of the *c-MET* (A) and *EGFR* (B) gene.

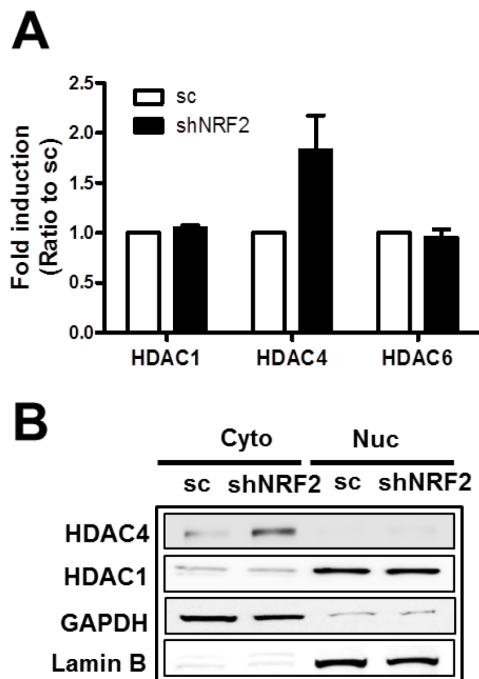

**Supplementary Figure 7:** (A) The transcript levels for HDAC1, HDAC4, and HDAC6 were measured in sc and shNRF2-SKOV3 cells. (B) Cytoplasmic (Cyto) and nuclear (Nuc) protein levels of HDAC1 and HDAC4 were assessed by Western blotting.
